# Supplementary material for: LBD16 and LBD18 acting downstream of ARF7 and ARF19 are involved in adventitious root formation in Arabidopsis
Source: Springer Nature journal article supplement (doi:10.1186/s12870-019-1659-4), 2019-01-31
Supplement: MOESM1 [file 12870_2019_1659_MOESM1_ESM.pdf]

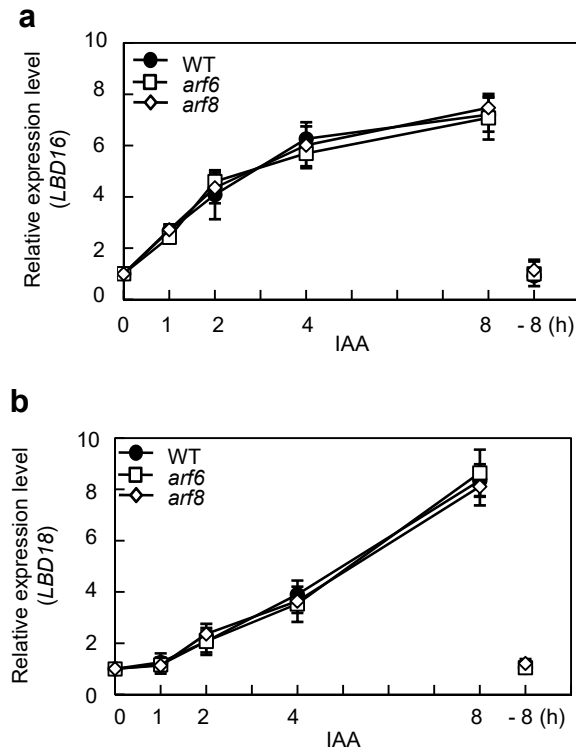

**Supplementary Fig. S1** Time-course expression of *LBD16* and *LBD18* in response to auxin in Col-0, *arf6* and *arf8* mutants. **(a)** and **(b)** Expression analysis of *LBD16* (a) and *LBD18* (b) in Col-0, *arf6* and *arf8* in the presence of IAA at different time points. Seven-d-old seedlings were treated with or without 20  $\mu$ M IAA for the indicated times, and the seedlings were harvested for RT-qPCR analysis. (–8 h indicates samples incubated with mock for 8 h). The relative fold changes were plotted after normalization to *ACTIN7*, and represent the ratio of the transcript level in the given treatment relative to the transcript level at time = 0. Mean  $\pm$  SE values were determined from three biological replicates (each biological replicate was estimated as the average of two technical RT-qPCR replicates).
